# Supplementary material for: The Prediction and Validation of Small CDSs Expand the Gene Repertoire of the Smallest Known Eukaryotic Genomes
Source: PLoS One. 2015 Sep 30;10(9):e0139075. doi: 10.1371/journal.pone.0139075 (PMC4589312; doi:10.1371/journal.pone.0139075)
Supplement: S1 Table — (XLSX) [file pone.0139075.s002.xlsx]

## Sheet: E.cuniculi
Supplementary Table S1 : List of newly predicted encoding protein genes in the E. cuniculi genome based on annotation of the E. hellem and E. romaleae genomes
	chromosome ID	Locus	Positions	Biological Process (Gene Ontology)	Molecular Function (Gene Ontology)	Interpro Motif
chromosome 7	CP001948	ECU07_1523	176885..177688
chromosome 10	CP001951	ECU10_0805	complement(join(109856..110061,110085..110241,110270..110296))

## Sheet: E.intestinalis
Supplementary Table S1 : List of newly predicted encoding protein genes in the E. intestinalis genome based on annotation of the E. hellem and E. romaleae genomes
	chromosome ID	Locus	Positions	Biological Process (Gene Ontology)	Molecular Function (Gene Ontology)	Interpro Motif
chromosome 7	AL590447	Eint_071493	167742..168545
chromosome 10	AL590449	Eint_100755	complement(join(97079..97284,97308..97464,97493..97519))

## Sheet: E. hellem
Supplementary Table S1 : List of newly predicted encoding protein genes in the E. hellem genome based on the recent re-annotation of the E. cuniculi and E. intestinalis genomes
	chromosome ID	Locus	Positions	E. cuniculi orthologous locus	Biological Process (Gene Ontology)	Molecular Function (Gene Ontology)	Interpro Motif
chromosome 1	CP002713	EHEL_010385	complement(41870..42130)	ECU01_0525
	CP002713	EHEL_010425	45944..46162	ECU01_0555
	CP002713	EHEL_010855	86126..86377	ECU01_0975		zinc ion binding (GO:0008270)	IPR007527 Zinc finger, SWIM-type
	CP002713	EHEL_011285	143403..143669	ECU01_1375
chromosome 2	CP002714	EHEL_020115	15575..16018	ECU02_0180
	CP002714	EHEL_020145	complement(19417..19692)	ECU02_0215
	CP002714	EHEL_020282	complement(34886..35149)	ECU02_0355
	CP002714	EHEL_020505	complement(59518..59721)	ECU02_0565
	CP002714	EHEL_020555	complement(65908..66201)	ECU02_0615
	CP002714	EHEL_020615	complement(76288..76725)	ECU02_0690	protein oligomerization (GO:0051259); protein folding (GO:0006457)	chaperone binding (GO:0051087)	IPR001623 DnaJ domain; IPR009073 Co-chaperone HscB, C-terminal oligomerisation domain; IPR004640 Co-chaperone Hsc20
	CP002714	EHEL_020625	78184..78438	ECU02_0705
	CP002714	EHEL_020705	complement(85629..86033)	ECU02_0785
	CP002714	EHEL_020775	complement(93413..93649)	ECU02_0865
	CP002714	EHEL_021325	159869..160045	ECU02_1395
chromosome 3	CP002715	EHEL_030295	complement(33845..34114)	ECU03_0377
	CP002715	EHEL_031095	complement(128129..128293)	ECU03_1175
	CP002715	EHEL_031475	170785..171060	ECU03_1535
chromosome 4	CP002716	EHEL_040075	8312..8590	ECU04_0155
	CP002716	EHEL_040335	38593..38826	ECU04_0415
	CP002716	EHEL_040475	54171..54452	ECU04_0575			IPR015419 EKC/KEOPS complex, subunit Pcc1
	CP002716	EHEL_040615	74298..74549	ECU04_0715
	CP002716	EHEL_040845	complement(104345..104653)	ECU04_0925
	CP002716	EHEL_040925	117548..117721	ECU04_1005	translation (GO:0006412)	structural constituent of ribosome (GO:0003735)	IPR002673 Ribosomal protein L29e
	CP002716	EHEL_041397	complement(167895..168071)	ECU04_1425
	CP002716	EHEL_041405	169171..169368	ECU04_1435
	CP002716	EHEL_041575	complement(186230..186460)	ECU04_1605
chromosome 5	CP002717	EHEL_050135	20299..20583	ECU05_0085
	CP002717	EHEL_050215	complement(31264..31446)	ECU05_0185			IPR011107 Protein phosphatase inhibitor
	CP002717	EHEL_050525	68153..68419	ECU05_0465
	CP002717	EHEL_050865	complement(111790..112035)	ECU05_0785
	CP002717	EHEL_051175	143323..143586	ECU05_1075
	CP002717	EHEL_051265	complement(157824..158090)	ECU05_1165
	CP002717	EHEL_051625	193866..194093	ECU05_1495			IPR019955 Ubiquitin supergroup
chromosome 6	CP002718	EHEL_060075	complement(11378..11614)	ECU06_0155
	CP002718	EHEL_060077	complement(11679..11879)	ECU06_0157
	CP002718	EHEL_060095	13835..14059	ECU06_0175			IPR009653 Protein of unknown function DUF1242
	CP002718	EHEL_060105	complement(16567..16767)	ECU06_0185
	CP002718	EHEL_060355	47639..47902	ECU06_0415	ribosome biogenesis (GO:0042254)		IPR012948 AARP2CN IPR007034 Ribosome biogenesis protein BMS1/TSR1, C-terminal
	CP002718	EHEL_060375	complement(50769..51137)	ECU06_0435
	CP002718	EHEL_060525	69327..69575	ECU06_0575
	CP002718	EHEL_060535	70624..70890	ECU06_0585
	CP002718	EHEL_060555	73455..73739	ECU06_0605
	CP002718	EHEL_060685	88536..88805
	CP002718	EHEL_060885	122573..122758	ECU06_0935
	CP002718	EHEL_061075	complement(142372..142593)	ECU06_1135
	CP002718	EHEL_061385	complement(170606..170833)	ECU06_1405
	CP002718	EHEL_061405	complement(173593..173808)	ECU06_1425
chromosome 7	CP002719	EHEL_070425	57748..58041	ECU07_0455
	CP002719	EHEL_070835	complement(106501..106755)	ECU07_0865		heat shock protein binding (GO:0031072)	IPR001623 Heat shock protein DnaJ, N-terminal
	CP002719	EHEL_070945	114592..114840	ECU07_0965			IPR018783 Transcription factor, enhancer of yellow 2
	CP002719	EHEL_070965	116258..116530	ECU07_0985
	CP002719	EHEL_070995	complement(119018..119194)	ECU07_1007
	CP002719	EHEL_071095	complement(128654..128872)	ECU07_1115
	CP002719	EHEL_071635	189434..189703	ECU07_1655
	CP002719	EHEL_071785	complement(208397..208600)	ECU07_1805
chromosome 8	CP002720	EHEL_080065	6263..6442	ECU08_0145
	CP002720	EHEL_080185	19884..20069	ECU08_0265
	CP002720	EHEL_080245	complement(26480..26680)	ECU08_0325	ATP hydrolysis coupled proton transport (GO:0015991)	hydrogen ion transmembrane transporter activity (GO:0015078)	IPR008389 ATPase, V0 complex, subunit E
	CP002720	EHEL_080415	complement(41496..41651)	ECU08_0495
	CP002720	EHEL_080525	50846..51040	ECU08_0575
	CP002720	EHEL_080605	60809..60952	ECU08_0655
	CP002720	EHEL_081155	complement(115463..115669)	ECU08_1165
	CP002720	EHEL_081405	complement(141848..142120)	ECU08_1425
	CP002720	EHEL_081835	complement(183729..183971)	ECU08_1885
chromosome 9	CP002721	EHEL_090255	35134..35421	ECU09_0275
	CP002721	EHEL_090425	54015..54206	ECU09_0425
	CP002721	EHEL_090825	95673..95957	ECU09_0855
	CP002721	EHEL_090895	104646..104885	ECU09_0925			IPR013880 Yos1-like
	CP002721	EHEL_091495	158450..158632	ECU09_1195
	CP002722	EHEL_091625	7496..7693	ECU09_1615	nucleotide-excision repair (GO:0006289)	DNA binding (GO:0003677)	IPR009400 Nucleotide excision repair, TFIIH, subunit TTDA
chromosome 10	CP002723	EHEL_100065	4634..4837	ECU10_0085
	CP002723	EHEL_100365	complement(35746..36006)	ECU10_0355
	CP002723	EHEL_101055	131106..131261	ECU10_1045	transcription (GO:0006350)	DNA-directed RNA polymerase activity (GO:0003899) DNA binding (GO:0003677)	IPR006591 RNA polymerase Rbp10
	CP002723	EHEL_101175	146154..146417	ECU10_1155
	CP002723	EHEL_101485	complement(197286..197459)	ECU10_1465
chromosome 11	CP002724	EHEL_110105	complement(11104..11316)	ECU11_0225	translation (GO:0006412)	structural constituent of ribosome (GO:0003735)	IPR001931 Ribosomal protein S21e
	CP002724	EHEL_110455	54861..55118	ECU11_0585			IPR015418 Histone H4 acetyltransferase, NuA4 complex, Eaf6
	CP002724	EHEL_110815	97704..97913	ECU11_0935
	CP002724	EHEL_110945	complement(107908..108138)	ECU11_1065
	CP002724	EHEL_111315	complement(155232..155480)	ECU11_1425
	CP002724	EHEL_111645	complement(193601..193999)	ECU11_1755
	CP002724	EHEL_111955	complement(232780..232983)	ECU11_2045

## Sheet: E. romalae
Supplementary Table S1 : List of newly predicted encoding protein genes in the E. romaleae genome based on the recent re-annotation of the E. cuniculi and E. intestinalis genomes
	chromosome ID	Locus	Positions	E. cuniculi orthologous locus	Biological Process (Gene Ontology)	Molecular Function (Gene Ontology)	Interpro Motif
chromosome 1	CP003518	EROM_010305	complement(28744..29010)	ECU01_0525
	CP003518	EROM_010345	32831..33031	ECU01_0555
	CP003518	EROM_010775	73141..73380	ECU01_0975		zinc ion binding (GO:0008270)	IPR007527 Zinc finger, SWIM-type
	CP003518	EROM_011215	131354..131620	ECU01_1375
chromosome 2	CP003519	EROM_020125	complement(14038..14313)	ECU02_0215
	CP003519	EROM_020265	complement(29486..29746)	ECU02_0355
	CP003519	EROM_020485	complement(54129..54341)	ECU02_0565
	CP003519	EROM_020625	72842..73099	ECU02_0705
	CP003519	EROM_020705	complement(80297..80632)	ECU02_0875
	CP003519	EROM_020775	complement(87992..88228)	ECU02_0865
	CP003519	EROM_021305	154609..154785	ECU02_1395
chromosome 3	CP003520	EROM_030277	complement(35054..35323)	ECU03_0377
	CP003520	EROM_031055	complement(129493..129663)	ECU03_1175
	CP003520	EROM_031425	172064..172339	ECU03_1535
chromosome 4	CP003521	EROM_040105	10196..10474	ECU04_0155
	CP003521	EROM_040365	40559..40792	ECU04_0415
	CP003521	EROM_040505	56129..56413	ECU04_0575			IPR015419 EKC/KEOPS complex, subunit Pcc1
	CP003521	EROM_040645	76249..76524	ECU04_0715
	CP003521	EROM_040965	119509..119682	ECU04_1005	translation (GO:0006412)	structural constituent of ribosome (GO:0003735)	IPR002673 Ribosomal protein L29e
	CP003521	EROM_041455	169581..169871	ECU04_1422	ubiquitin-dependent protein catabolic process (GO:0006511)		IPR016073 SKP1 component, POZ
	CP003521	EROM_041457	complement(169951..170127)	ECU04_1425
	CP003521	EROM_041465	171227..171424	ECU04_1435
	CP003521	EROM_041635	complement(188303..188536)	ECU04_1605
chromosome 5	CP003522	EROM_050145	complement(19973..20155)	ECU05_0185			IPR011107 Protein phosphatase inhibitor
	CP003522	EROM_050455	56725..56991	ECU05_0465
	CP003522	EROM_050795	complement(100478..100720)	ECU05_0785
	CP003522	EROM_051105	132015..132278	ECU05_1075
	CP003522	EROM_051195	complement(146523..146789)	ECU05_1165
	CP003522	EROM_051565	182611..182838	ECU05_1495			IPR019955 Ubiquitin supergroup
chromosome 6	CP003523	EROM_060055	complement(7149..7385)	ECU06_0155
	CP003523	EROM_060057	complement(7456..7656)	ECU06_0157
	CP003523	EROM_060095	complement(12356..12556)	ECU06_0185
	CP003523	EROM_060335	43324..43587	ECU06_0415	ribosome biogenesis (GO:0042254)		IPR012948 AARP2CN; IPR007034 Ribosome biogenesis protein BMS1/TSR1, C-terminal
	CP003523	EROM_060355	complement(46458..46823)	ECU06_0435
	CP003523	EROM_060515	65139..65384	ECU06_0575
	CP003523	EROM_060525	66434..66700	ECU06_0585
	CP003523	EROM_060545	69270..69554	ECU06_0605
	CP003523	EROM_060665	84325..84594
	CP003523	EROM_060885	118476..118658	ECU06_0935
	CP003523	EROM_061085	complement(138408..138629)	ECU06_1135
	CP003523	EROM_061385	complement(166601..166813)	ECU06_1405
	CP003523	EROM_061405	complement(169617..169829)	ECU06_1425
chromosome 7	CP003524	EROM_070405	53663..53956	ECU07_0455
	CP003524	EROM_070815	complement(102486..102731)	ECU07_0865		heat shock protein binding (GO:0031072)	IPR001623 Heat shock protein DnaJ, N-terminal
	CP003524	EROM_070915	110585..110833	ECU07_0965			IPR018783 Transcription factor, enhancer of yellow 2
	CP003524	EROM_070935	112255..112530	ECU07_0985
	CP003524	EROM_070965	complement(115034..115210)	ECU07_1007
	CP003524	EROM_071065	complement(124736..124954)	ECU07_1115
	CP003524	EROM_071435	166872..167675	ECU07_1523
	CP003524	EROM_071575	185376..185645	ECU07_1655
chromosome 8	CP003525	EROM_080065	6222..6392	ECU08_0145
	CP003525	EROM_080185	19885..20070	ECU08_0265
	CP003525	EROM_080245	complement(26477..26677)	ECU08_0325	ATP hydrolysis coupled proton transport (GO:0015991)	hydrogen ion transmembrane transporter activity (GO:0015078)	IPR008389 ATPase, V0 complex, subunit E
	CP003525	EROM_080415	complement(41538..41675)	ECU08_0495
	CP003525	EROM_080525	50942..51136	ECU08_0575
	CP003525	EROM_080605	60920..61063	ECU08_0655
	CP003525	EROM_081175	complement(115785..116015)	ECU08_1165
	CP003525	EROM_081425	complement(141698..141970)	ECU08_1425
	CP003525	EROM_081865	complement(184350..184583)	ECU08_1885
chromosome 9	CP003526	EROM_090265	34989..35276	ECU09_0275
	CP003526	EROM_090435	53879..54073	ECU09_0425
	CP003527	EROM_090565	complement(3912..4094)	ECU09_1195
	CP003527	EROM_091255	71145..71429	ECU09_0855
	CP003527	EROM_091325	80133..80372	ECU09_0925			IPR013880 Yos1-like
	CP003528	EROM_091605	7961..8158	ECU09_1615	nucleotide-excision repair (GO:0006289)	DNA binding (GO:0003677)	IPR009400 Nucleotide excision repair, TFIIH, subunit TTDA
chromosome 10	CP003529	EROM_100235	complement(23887..24144)	ECU10_0355
	CP003529	EROM_100925	119230..119385	ECU10_1045	transcription (GO:0006350)	DNA-directed RNA polymerase activity (GO:0003899) DNA binding (GO:0003677)	IPR006591 RNA polymerase Rbp10
	CP003529	EROM_101045	134308..134571	ECU10_1155
	CP003529	EROM_101355	complement(185493..185657)	ECU10_1465
chromosome 11	CP003530	EROM_110095	complement(9675..9887)	ECU11_0225	translation (GO:0006412)	structural constituent of ribosome (GO:0003735)	IPR001931 Ribosomal protein S21e
	CP003530	EROM_110445	53379..53639	ECU11_0585			IPR015418 Histone H4 acetyltransferase, NuA4 complex, Eaf6
	CP003530	EROM_110805	96258..96467	ECU11_0935
	CP003530	EROM_110935	complement(106482..106712)	ECU11_1065
	CP003530	EROM_111315	complement(153953..154201)	ECU11_1425
	CP003530	EROM_111645	complement(192298..192663)	ECU11_1755
